# Supplementary material for: Selective cytotoxic effect against the MDA-MB-468 breast cancer cell line of the antibacterial palindromic peptide derived from bovine lactoferricin
Source: Royal Society of Chemistry journal article supplement (doi:10.1039/d0ra02688c), 2020-01-01
Supplement: d0ra02688c1.pdf [file d0ra02688c1.pdf]

Supplementary Material:

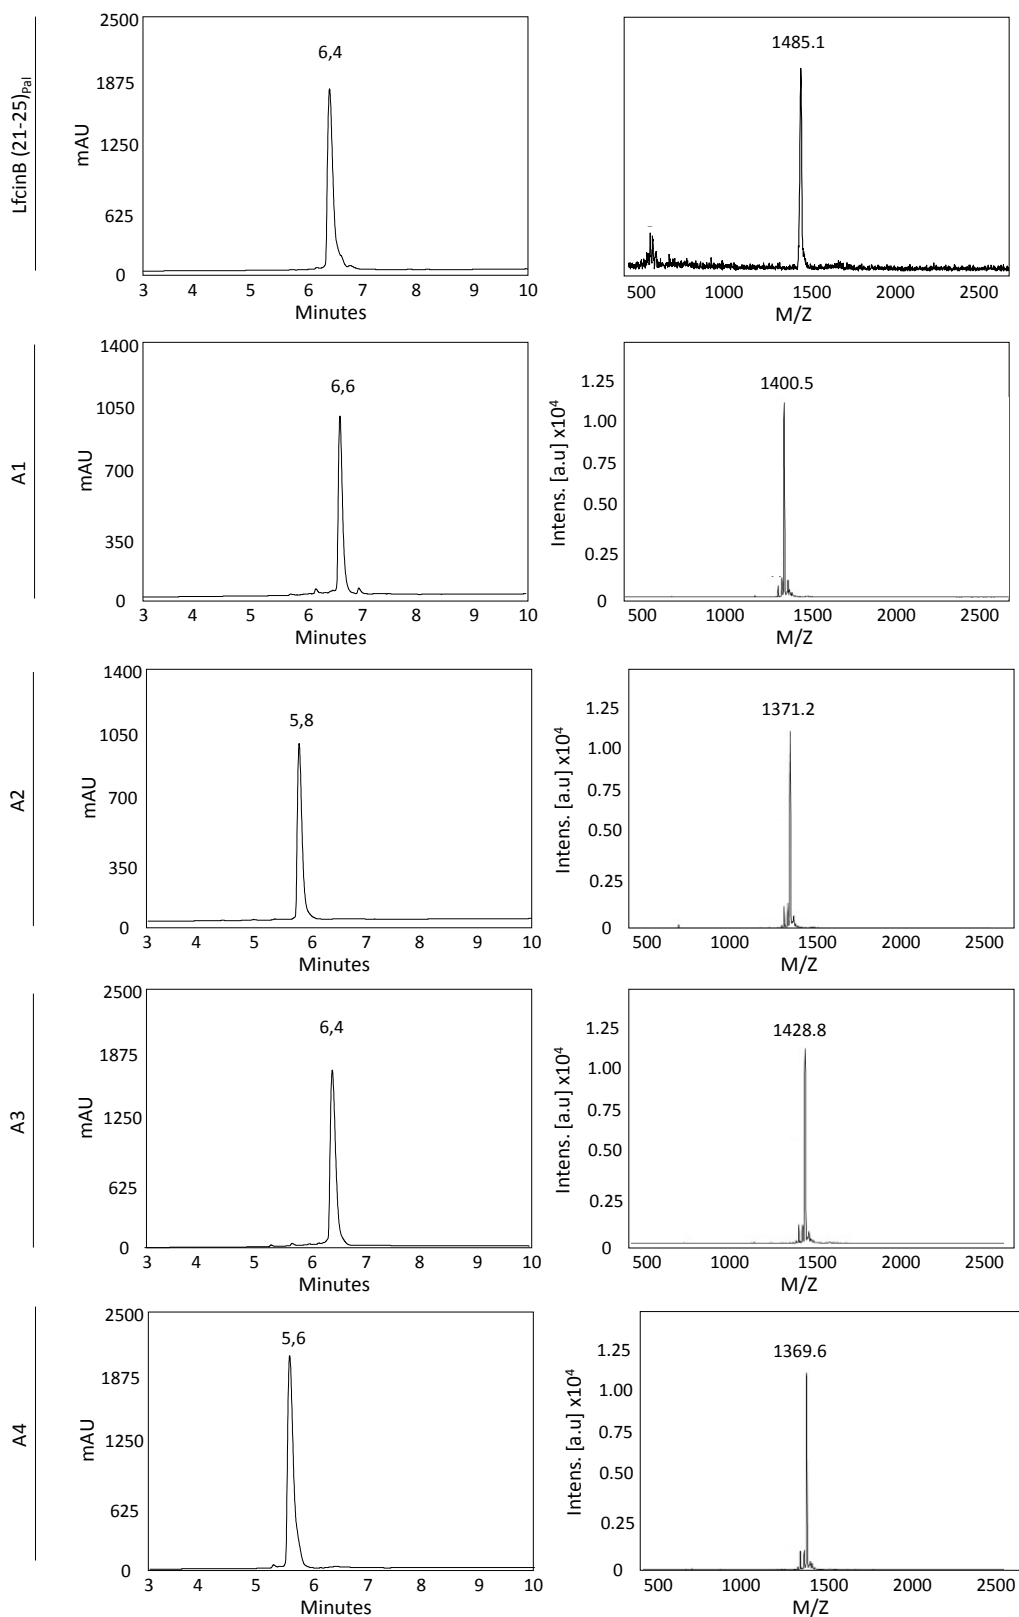

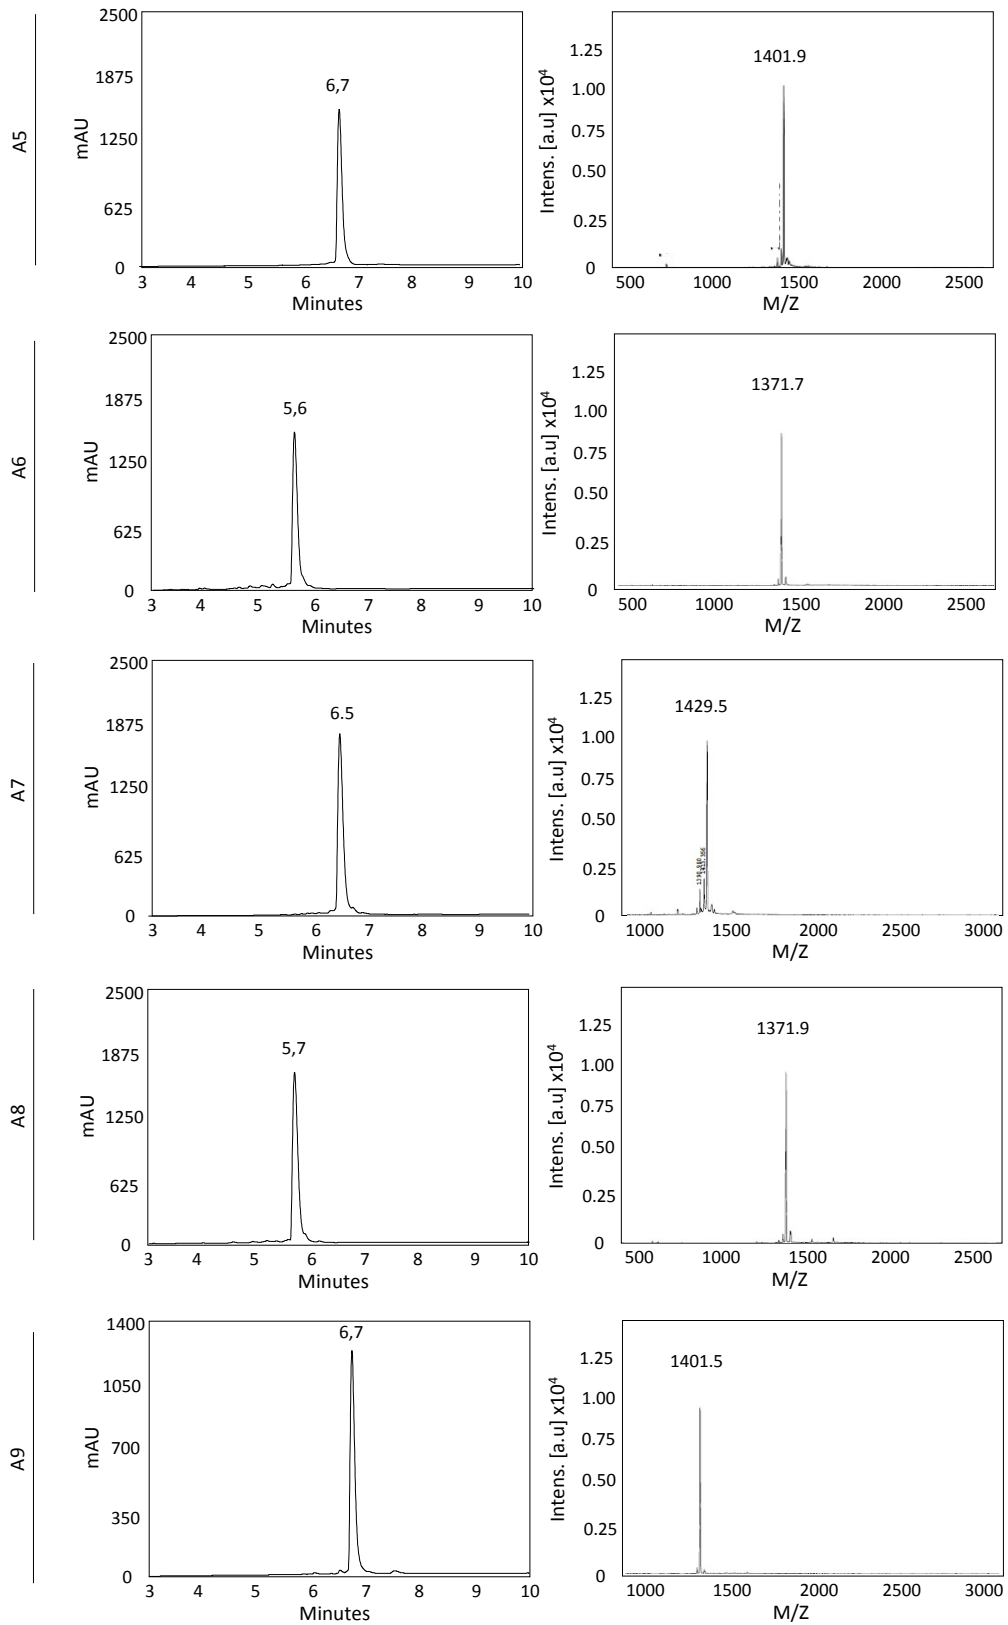

**Fig. S1** Characterization of peptides, Reverse phase high performance liquid chromatography (RP-HPLC) analysis (left) and matrix-assisted laser desorption/ionization-time of flight mass spectrometry (MALDI-TOF) mass spectrum (right)

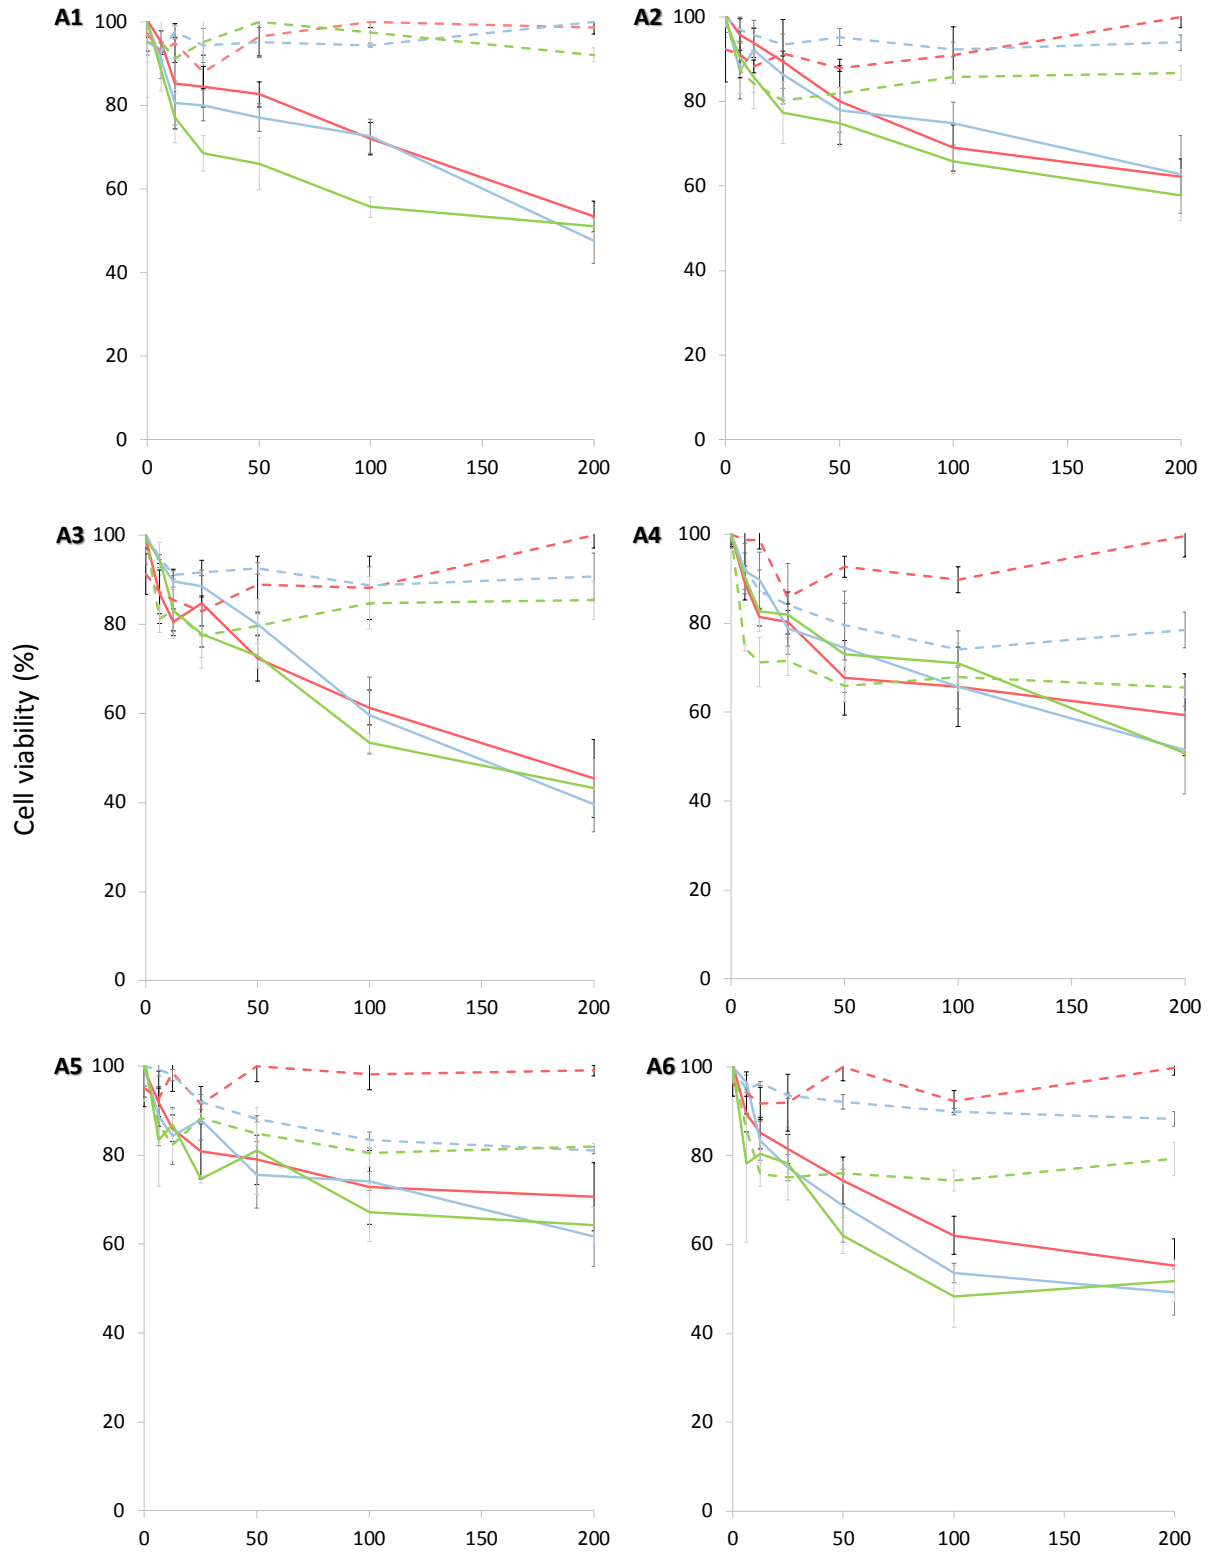

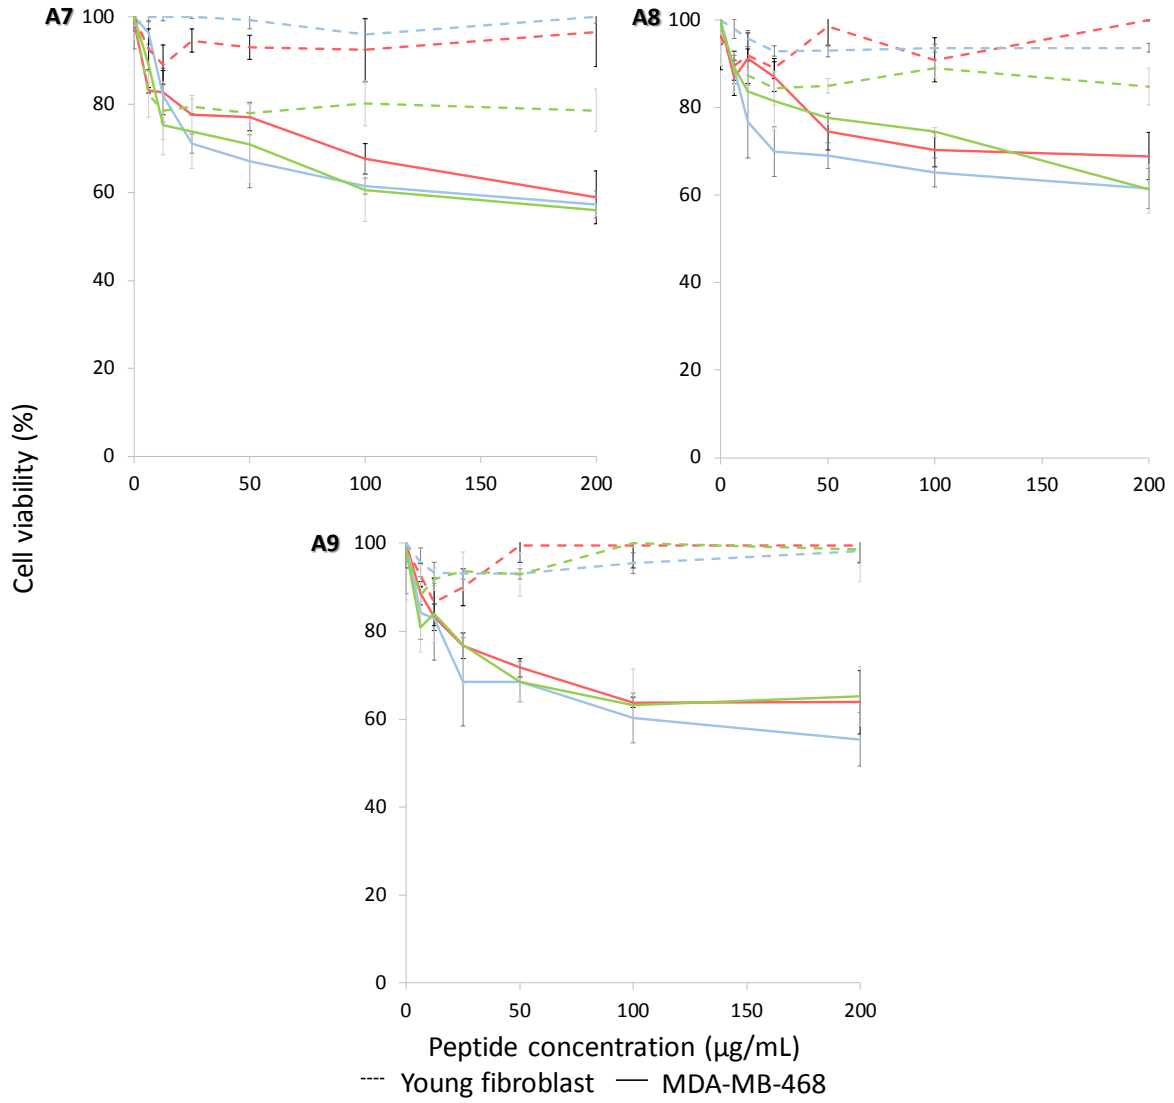

**Fig. S2** Cytotoxic effect of analogue peptides against young fibroblast and MDA-MB-468 cells incubated at 2h (red), 24 h (blue) and 48 h (green).

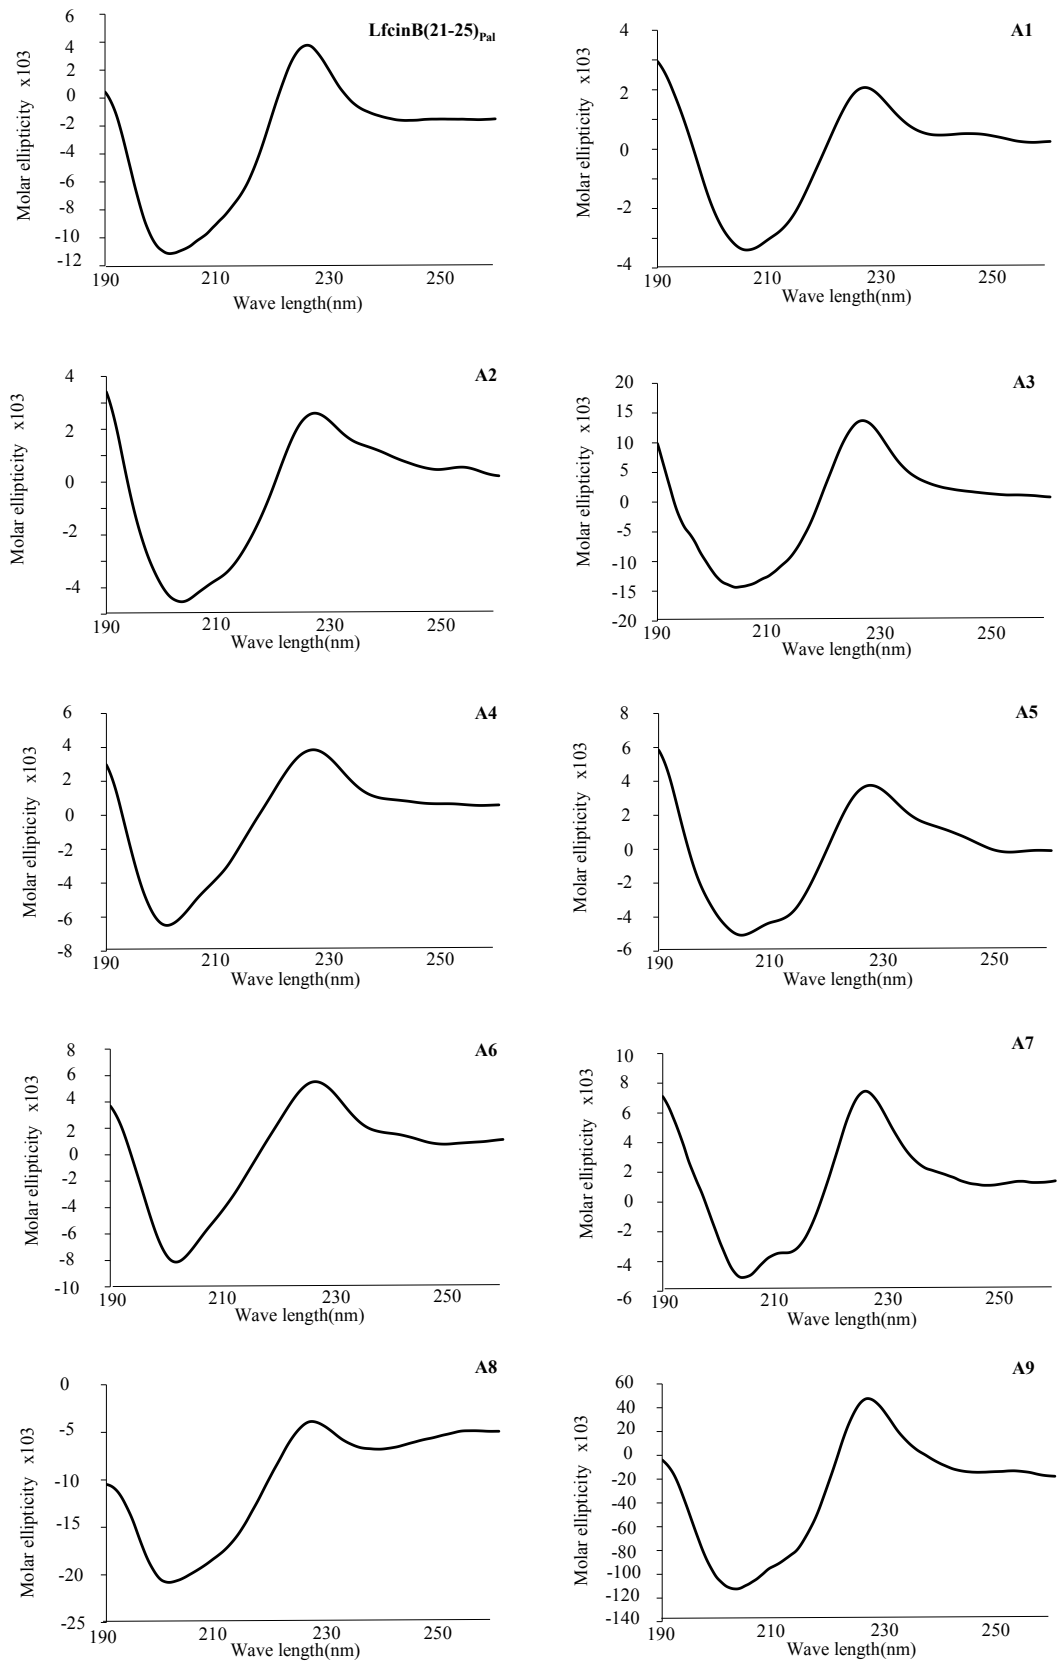

**Fig. S3.** Circular dichroism (CD) spectra of palindromic peptide and its analogues.
